# Supplementary material for: Online Communication of Local Governments During COVID-19 Pandemic in Hungary
Source: Frontiers journal article supplement (doi:10.3389/fpos.2021.711170), 2021-09-29
Supplement: Data_Sheet_1.xlsx [file Data_Sheet_1.xlsx]

## Sheet: Munka1
	2020-03-01	2020-03-02	2020-03-03	2020-03-04	2020-03-05	2020-03-06	2020-03-07	2020-03-08	2020-03-09	2020-03-10	2020-03-11	2020-03-12	2020-03-13	2020-03-14	2020-03-15	2020-03-16	2020-03-17	2020-03-18	2020-03-19	2020-03-20	2020-03-21	2020-03-22	2020-03-23	2020-03-24	2020-03-25	2020-03-26	2020-03-27	2020-03-28	2020-03-29	2020-03-30	2020-03-31	2020-04-01	2020-04-02	2020-04-03	2020-04-04	2020-04-05	2020-04-06	2020-04-07	2020-04-08	2020-04-09	2020-04-10	2020-04-11	2020-04-12	2020-04-13	2020-04-14	2020-04-15	2020-04-16	2020-04-17	2020-04-18
daily new cases	0	0	0	2	1	1	3	2	3	0	1	3	3	11	2	7	11	8	15	12	18	28	36	20	39	35	39	43	65	39	45	33	60	38	55	55	11	73	78	85	210	120	100	48	54	67	73	111	71
seven-day moving average	0	0	0	0.285714	0.428571	0.571429	1	1.28571	1.71429	1.71429	1.57143	1.85714	2.14286	3.28571	3.28571	3.85714	5.42857	6.42857	8.14286	9.42857	10.4286	14.1429	18.2857	19.5714	24	26.8571	30.7143	34.2857	39.5714	40	43.5714	42.7143	46.2857	46.1429	47.8571	46.4286	42.4286	46.4286	52.8571	56.4286	81	90.2857	96.7143	102	99.2857	97.7143	96	81.8571	74.8571
[truncated: 419 more columns]
